# Supplementary material for: DGAT1 Expression Promotes Ovarian Cancer Progression and Is Associated with Poor Prognosis
Source: Hindawi journal article supplement (doi:10.1155/2021/6636791), 2021-05-14
Supplement: f1 [file 6636791.f1.pdf]

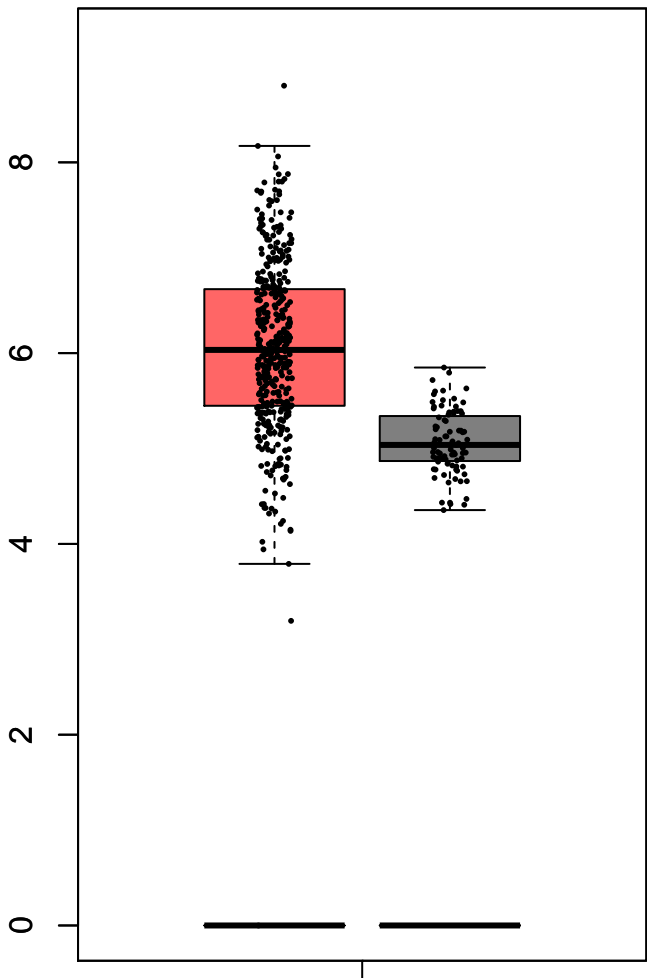

OV

(num(T)=426; num(N)=88)
